# Supplementary material for: Characteristics and Outcomes of Patients With Aortic Stenosis and Chronic Kidney Disease
Source: PubMed Central journal article supplement — J Am Heart Assoc. 2019 Jan 26;8(3):e009980. doi: 10.1161/JAHA.118.009980 (PMC6405577; doi:10.1161/jaha.118.009980), 2019-01-26

# **SUPPLEMENTAL MATERIAL**

**Table S1. Patient characteristics before and after propensity match.**

| Factor                                  | Before Match                |                                     | After Match                              |                                     |
|-----------------------------------------|-----------------------------|-------------------------------------|------------------------------------------|-------------------------------------|
|                                         | Control population (N=7032) | Study population AS and CKD (N=839) | Matched Controls with CKD; no AS (N=839) | Study population AS and CKD (N=839) |
| Age                                     | 69.8±12.3                   | 78.3±8.8                            | 78.5±9.4                                 | 78.3±8.8                            |
| Male                                    | 3667(52.1)                  | 426(50.8)                           | 423(50.4)                                | 426(50.8)                           |
| African American                        | 1295(18.4)                  | 70(8.3)                             | 79(9.4)                                  | 70(8.3)                             |
| Body mass index, kg/m <sup>2</sup>      | 29.8±6.8                    | 29.7±6.6                            | 28.4±5.7                                 | 29.7±6.6                            |
| Systolic Blood Pressure, mmHg           | 129.2±21.3                  | 133.0±21.3                          | 131.4±20.0                               | 133.0±21.3                          |
| Diastolic Blood Pressure, mmHg          | 72.1±11.7                   | 69.9±11.2                           | 71.1±11.0                                | 69.9±11.2                           |
| Hypertension                            | 6294(89.5)                  | 784(93.4)                           | 772(92.0)                                | 784(93.4)                           |
| Diabetes                                | 1885(26.8)                  | 237(28.2)                           | 172(20.5)                                | 237(28.2)                           |
| Hyperlipidemia                          | 5590(79.5)                  | 716(85.3)                           | 666(79.4)                                | 716(85.3)                           |
| Coronary Artery Disease                 | 2263(32.2)                  | 311(37.1)                           | 263(31.3)                                | 311(37.1)                           |
| Congestive Heart Failure                | 1196(17.0)                  | 87(10.4)                            | 69(8.2)                                  | 87(10.4)                            |
| Current smoking                         | 495(7.0)                    | 39(4.6)                             | 39(4.6)                                  | 39(4.6)                             |
| Cerebrovascular disease                 | 923(13.1)                   | 138(16.4)                           | 130(15.5)                                | 138(16.4)                           |
| Peripheral vascular disease             | 266(3.8)                    | 57(6.8)                             | 41(4.9)                                  | 57(6.8)                             |
| Malignancy                              | 1940(27.6)                  | 230(27.4)                           | 252(30.0)                                | 230(27.4)                           |
| eGFR, ml/min/m <sup>2</sup> *           | 46.0±10.9                   | 46.0±10.4                           | 46.5±10.8                                | 46.0±10.4                           |
| Stage of Chronic Kidney Disease         |                             |                                     |                                          |                                     |
| Stage 3a (45-59 ml/min/m <sup>2</sup> ) | 4297(61.1)                  | 511(60.9)                           | 529(63.1)                                | 511(60.9)                           |

| Factor                                  | Before Match                |                                     | After Match                              |                                     |
|-----------------------------------------|-----------------------------|-------------------------------------|------------------------------------------|-------------------------------------|
|                                         | Control population (N=7032) | Study population AS and CKD (N=839) | Matched Controls with CKD; no AS (N=839) | Study population AS and CKD (N=839) |
| Stage 3b (30-44 ml/min/m <sup>2</sup> ) | 1993(28.3)                  | 252(30.0)                           | 234(27.9)                                | 252(30.0)                           |
| Stage 4 (15-29 ml/min/m <sup>2</sup> )  | 742(10.6)                   | 76(9.1)                             | 76(9.1)                                  | 76(9.1)                             |
| Proteinuria                             | 1191(30.4)                  | 112(27.4)                           | 109(23.9)                                | 112(27.4)                           |
| Year of Echocardiogram                  |                             |                                     |                                          |                                     |
| 2004                                    | 246 (3.5)                   | 20(2.4)                             | 22(2.6)                                  | 20(2.4)                             |
| 2005                                    | 1395(19.8)                  | 147(17.5)                           | 149(17.8)                                | 147(17.5)                           |
| 2006                                    | 1360(19.3)                  | 163(19.4)                           | 179(21.3)                                | 163(19.4)                           |
| 2007                                    | 1024(14.6)                  | 148(17.6)                           | 154(18.4)                                | 148(17.6)                           |
| 2008                                    | 985(14.0)                   | 137(16.3)                           | 127(15.1)                                | 137(16.3)                           |
| 2009                                    | 904(12.9)                   | 106(12.6)                           | 112(13.3)                                | 106(12.6)                           |
| 2010                                    | 829(11.8)                   | 93(11.1)                            | 85(10.1)                                 | 93(11.1)                            |
| 2011                                    | 278(4.0)                    | 23(2.7)                             | 10(1.2)                                  | 23(2.7)                             |
| 2012                                    | 11(0.16)                    | 2(0.24)                             | 1(0.12)                                  | 2(0.24)                             |
| Hemoglobin, mg/dL                       | 12.4±1.9                    | 12.3±1.9                            | 12.7±1.8                                 | 12.3±1.9                            |
| Albumin, g/dL                           | 4.0±0.54                    | 4.0±0.49                            | 4.0±0.50                                 | 4.0±0.49                            |
| Calcium, mg/dL                          | 9.5±0.65                    | 9.4±0.59                            | 9.4±0.61                                 | 9.4±0.59                            |
| Alkaline phosphatase, U/L               | 84.0[67.0,108.0]            | 80.0[65.0,101.0]                    | 81.0[66.0,103.0]                         | 80.0[65.0,101.0]                    |
| Beta Blocker                            | 4897(69.6)                  | 533(63.5)                           | 558(66.5)                                | 533(63.5)                           |
| ACE/ARB                                 | 4963(70.6)                  | 617(73.5)                           | 566(67.5)                                | 617(73.5)                           |
| Diuretic                                | 5314(75.6)                  | 655(78.1)                           | 610(72.7)                                | 655(78.1)                           |
| Statin                                  | 4367(62.1)                  | 576(68.7)                           | 523(62.3)                                | 576(68.7)                           |
| Vasodilator                             | 1884(26.8)                  | 222(26.5)                           | 194(23.1)                                | 222(26.5)                           |

| Factor               | Before Match                   |                                           | After Match                                    |                                           |
|----------------------|--------------------------------|-------------------------------------------|------------------------------------------------|-------------------------------------------|
|                      | Control population<br>(N=7032) | Study population<br>AS and CKD<br>(N=839) | Matched Controls with<br>CKD; no AS<br>(N=839) | Study population<br>AS and CKD<br>(N=839) |
| Phosphate Binder     | 219(3.1)                       | 24(2.9)                                   | 18(2.1)                                        | 24(2.9)                                   |
| Ejection Fraction, % | 53.0±11.9                      | 59.0±5.4                                  | 58.9±5.0                                       | 59.0±5.4                                  |

Values presented as Mean±SD, Median [P25, P75], or N (%). eGFR= glomerular filtration rate calculated using CKD-EPI equation.  
ACEI: Angiotension Converting Enzyme Inhibitor, ARB: Angiotension Receptor Blocker

**Table S2. Univariate predictors of all-cause mortality in patients with concomitant aortic stenosis and chronic kidney disease.**

| <b>Factor</b>                                 | <b>Univariable Hazard Ratio (95% CI)</b> | <b>p-value</b> | <b>Overall p for multiple categories</b> |
|-----------------------------------------------|------------------------------------------|----------------|------------------------------------------|
| Age per 10 year older                         | 1.4 (1.2, 1.6)                           | <0.001         |                                          |
| Male vs. Female                               | 1.10 (0.90, 1.3)                         | 0.345          |                                          |
| African American Race                         | 1.1 (0.83, 1.6)                          | 0.410          |                                          |
| Body mass Index, kg/m <sup>2</sup>            |                                          |                | <0.001                                   |
| <25                                           | Ref                                      |                |                                          |
| 25-29.9                                       | 0.67 (0.52, 0.86)                        | 0.001          |                                          |
| ≥30                                           | 0.60 (0.46, 0.77)                        | <0.001         |                                          |
| Systolic Blood Pressure, per 1 mmHg increase  | 1.00 (0.99, 1.00)                        | 0.379          |                                          |
| Diastolic Blood Pressure, per 1 mmHg increase | 0.99 (0.98, 1.00)                        | 0.167          |                                          |
| Hypertension                                  | 0.73 (0.51, 1.04)                        | 0.082          |                                          |
| Diabetes                                      | 0.99 (0.79, 1.2)                         | 0.896          |                                          |
| Hyperlipidemia                                | 0.53 (0.42, 0.67)                        | <0.001         |                                          |
| Coronary Artery Disease                       | 0.99 (0.81, 1.2)                         | 0.953          |                                          |
| Congestive Heart Failure                      | 1.6 (1.2, 2.1)                           | 0.002          |                                          |
| Ejection Fraction per 5% lower                | 1.2 (1.06, 1.3)                          | 0.002          |                                          |
| Current Smoking                               | 1.3 (0.85, 2.0)                          | 0.221          |                                          |
| Cerebrovascular disease                       | 1.00 (0.77, 1.3)                         | 0.982          |                                          |
| Peripheral vascular disease                   | 0.82 (0.54, 1.2)                         | 0.355          |                                          |
| Malignancy                                    | 1.5 (1.2, 1.8)                           | <0.001         |                                          |
| eGFR per 10 ml/min/m <sup>2</sup> lower       | 1.3 (1.2, 1.4)                           | <0.001         |                                          |
| Stages of Chronic Kidney Disease              |                                          |                |                                          |
| eGFR 45-59 ml/min/m <sup>2</sup> (Stage 3a)   | Ref                                      |                | <0.001                                   |
| eGFR 30-44 ml/min/m <sup>2</sup> (Stage 3b)   | 1.3 (1.03, 1.6)                          | 0.028          |                                          |
| eGFR 15-29 ml/min/m <sup>2</sup> (Stage 4)    | 2.2 (1.6, 2.9)                           | <0.001         |                                          |
| Hemoglobin per 1 mg/dL increase               | 0.87 (0.83, 0.92)                        | <0.001         |                                          |

| <b>Factor</b>                                    | <b>Univariable Hazard Ratio (95% CI)</b> | <b>p-value</b> | <b>Overall p for multiple categories</b> |
|--------------------------------------------------|------------------------------------------|----------------|------------------------------------------|
| Albumin per 1 g/dL increase                      | 0.62 (0.52, 0.75)                        | <0.001         |                                          |
| Calcium per 1 mg/dL increase                     | 0.68 (0.58, 0.81)                        | <0.001         |                                          |
| Log alkaline phosphatase per 1 unit              | 1.70 (1.36, 2.12)                        | <0.001         |                                          |
| Proteinuria                                      | 1.7 (1.3, 2.3)                           | <0.001         |                                          |
| Beta Blocker                                     | 1.01 (0.82, 1.2)                         | 0.918          |                                          |
| ACE/ARB                                          | 0.78 (0.63, 0.96)                        | 0.022          |                                          |
| Diuretic                                         | 0.98 (0.77, 1.2)                         | 0.838          |                                          |
| Statin                                           | 0.69 (0.56, 0.84)                        | <0.001         |                                          |
| Vasodilator                                      | 1.3 (1.06, 1.6)                          | 0.014          |                                          |
| Phosphate Binder                                 | 1.2 (0.71, 2.1)                          | 0.460          |                                          |
| Aortic Stenosis                                  |                                          |                | 0.002                                    |
| Mild                                             | Ref                                      |                |                                          |
| Moderate                                         | 0.90 (0.70, 1.16)                        | 0.411          |                                          |
| Asymptomatic Severe                              | 1.26 (0.95, 1.66)                        | 0.109          |                                          |
| Symptomatic Severe                               | 1.74 (1.16, 2.63)                        | 0.008          |                                          |
| Aortic Valve Area per 1 cm <sup>2</sup> increase | 0.72 (0.56, 0.95)                        | 0.017          |                                          |
| Peak Aortic Velocity (Vmax), m/s                 | 1.02 (0.995, 1.04)                       | 0.131          |                                          |
| Mean Gradient, mmHg                              | 1.01 (1.00, 1.02)                        | 0.008          |                                          |
| Right Ventricular Systolic Pressure, mmHg        | 1.02 (1.02, 1.03)                        | <0.001         |                                          |
| Indexed LVEDD cm/m <sup>2</sup>                  | 1.3 (0.96, 1.8)                          | 0.092          |                                          |
| Indexed LVESD cm/m <sup>2</sup>                  | 1.6 (1.2, 2.2)                           | 0.002          |                                          |
| Indexed LA diameter, cm/m <sup>2</sup>           | 1.8 (1.4, 2.3)                           | <0.001         |                                          |

eGFR= glomerular filtration rate calculated using CKD-EPI equation. ACEI: Angiotension Converting Enzyme Inhibitor, ARB: Angiotension Receptor Blocker. AVA= aortic valve area, LVEDD= left ventricular end diastolic diameter, LVESD= left ventricular end systolic diameter, LA= left atrial, LVOT= left ventricular outflow tract.

**Figure S1. Kaplan Meier survival curves of all-cause mortality in patients with aortic stenosis and concomitant chronic kidney disease based on severity of aortic stenosis.**

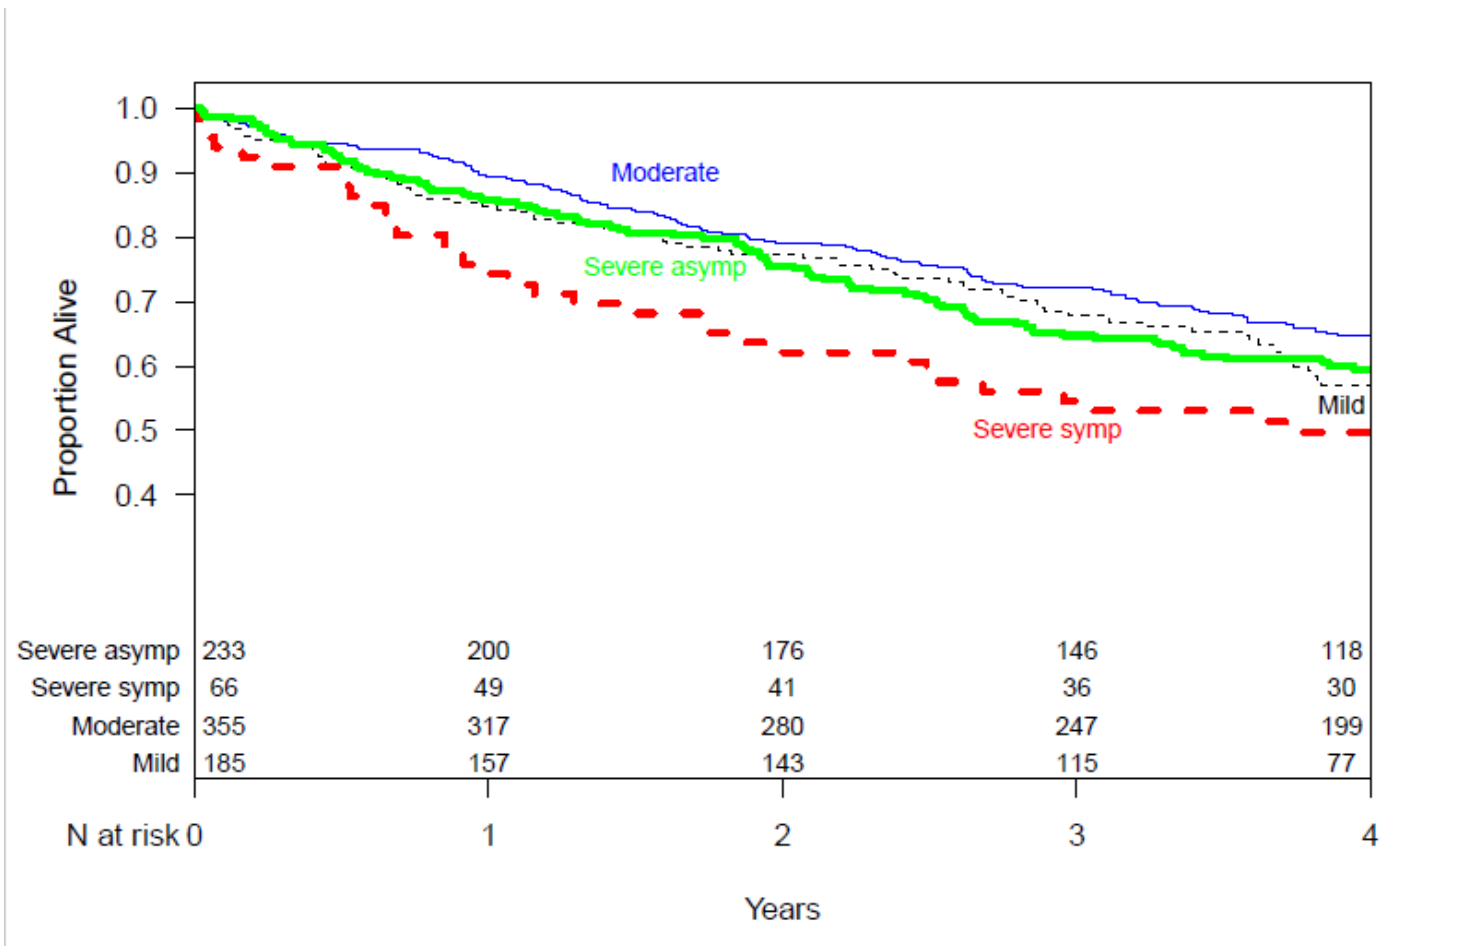

Supplement: JAH3-8-e009980-s001.pdf [file JAH3-8-e009980-s001.pdf]
